# Supplementary material
Source: publisher figshare collection journal article supplement (https://frontiersin.figshare.com/ndownloader/files/28219215)
Supplement: Supplementary file 1 [file 28219215]

## Sheet: This study
Sample	δD ( ‰ )	±	δ18O ( ‰ )	±	d-excess ( ‰ )	Max Catchment Elevation (m)	Catchment range (m)	Mean Catchment Elevation (m)	Catchment Size (m2)	Sampling elevation (m)	Type of water sample	Locality	Transect	Latitude	Longitude	Authors
ECUA-2019-W1	-15.2	0.8	-3.23	0.11	10.59	1159	1109	313	2.46528e+07	63	Stream	Pasaje - Santa Isabel	Pasaje	3°19'55.32"S	79°44'28.73"W	Gébelin et al. (this study)
ECUA-2019-W2	-21.2	0.9	-4.05	0.17	11.19	395	346	215	2.18849e+06	69	Stream	Pasaje - Santa Isabel	Pasaje	3°19'1.14"S	79°44'34.31"W	Gébelin et al. (this study)
ECUA-2019-W3	-26.9	0.5	-4.78	0.14	11.3	3546	3459	1452	1.20888e+08	91	Stream	Pasaje - Santa Isabel	Pasaje	3°19'18.90"S	79°43'19.83"W	Gébelin et al. (this study)
ECUA-2019-W4	-24.1	0.4	-5.42	0.03	19.26	280	194	206	300679	95	Stream	Pasaje - Santa Isabel	Pasaje	3°19'1.68"S	79°43'5.80"W	Gébelin et al. (this study)
ECUA-2019-W5	-22.8	0.2	-5.51	0.05	21.22	494	296	315	841140	182	Stream	Pasaje - Santa Isabel	Pasaje	3°18'51.30"S	79°40'2.65"W	Gébelin et al. (this study)
ECUA-2019-W6	-33.1	1	-5.42	0.05	10.22	3863	3447	2099	1.32963e+08	407	Stream	Pasaje - Santa Isabel	Pasaje	3°18'1.79"S	79°36'46.87"W	Gébelin et al. (this study)
ECUA-2019-W7	-23.9	0.9	-5.3	0.11	18.52	3087	2311	1726	2.22293e+07	768	Stream	Pasaje - Santa Isabel	Pasaje	3°18'9.95"S	79°31'43.95"W	Gébelin et al. (this study)
ECUA-2019-W8	-21.2	0.6	-4.96	0.11	18.51	1342	621	1024	334934	718	Stream	Pasaje - Santa Isabel	Pasaje	3°18'19.29"S	79°31'12.34"W	Gébelin et al. (this study)
ECUA-2019-W9	-49.1	0.3	-7.53	0.05	11.17	3908	2619	2655	6.1232e+07	1259	Stream	Santa Isabel	Pasaje	3°15'55.23"S	79°17'34.58"W	Gébelin et al. (this study)
ECUA-2019-W10	-37.6	0.4	-6.3	0.09	12.79	3384	2046	2350	2.07916e+07	1336	Stream	Santa Isabel	Pasaje	3°15'43.91"S	79°16'27.95"W	Gébelin et al. (this study)
ECUA-2019-W11	-42.2	0.5	-6.79	0.17	12.11	2378	941	1731	1.56296e+07	1438	Stream	Santa Isabel	Pasaje	3°15'32.54"S	79°14'40.55"W	Gébelin et al. (this study)
ECUA-2019-W12	-50	0.2	-7.12	0.03	6.93	3880	2936	2672	2.50196e+08	959	Stream	Uchuquay	Pasaje	3°21'21.22"S	79°21'31.60"W	Gébelin et al. (this study)
ECUA-2019-W13	-41.2	0.8	-5.83	0.13	5.47	3513	2580	2135	1.07544e+08	913	Stream	Uchuquay	Pasaje	3°20'47.75"S	79°22'53.15"W	Gébelin et al. (this study)
ECUA-2019-W14	-44.6	0.4	-6.48	0.03	7.23	4025	2464	3111	1.50497e+08	1509	Stream	Santa Isabel - Girón	Pasaje	3°13'44.87"S	79°13'5.80"W	Gébelin et al. (this study)
ECUA-2019-W15	-43.8	0.4	-6.61	0.06	9.08	2825	1261	2250	1.37856e+07	1509	Stream	Santa Isabel - Girón	Pasaje	3°13'44.87"S	79°13'5.80"W	Gébelin et al. (this study)
ECUA-2019-W16	-41.6	0.3	-6.2	0.06	7.98	2620	710	2175	1.56334e+06	1907	Stream	Santa Isabel - Girón	Pasaje	3°12'34.98"S	79°11'28.73"W	Gébelin et al. (this study)
ECUA-2019-W17	-40.1	1	-6.12	0.07	8.82	2805	863	2402	2.85074e+06	1947	Stream	Santa Isabel - Girón	Pasaje	3°11'7.39"S	79°10'14.80"W	Gébelin et al. (this study)
ECUA-2019-W18	-45.5	0.8	-6.84	0.12	9.25	3711	1584	2994	2.50144e+07	2030	Stream	Santa Isabel - Girón	Pasaje	3°10'6.24"S	79° 9'36.71"W	Gébelin et al. (this study)
ECUA-2019-W19	-56.4	0.8	-8.5	0.1	11.57	3910	1223	3449	2.28507e+07	2670	Stream	Girón - San Fernando	Pasaje	3° 7'45.36"S	79°14'8.17"W	Gébelin et al. (this study)
ECUA-2019-W20	-58.1	0.7	-8.68	0.08	11.26	4025	1458	3470	7.20307e+07	2567	Stream	Girón - San Fernando	Pasaje	3° 8'15.37"S	79°14'44.83"W	Gébelin et al. (this study)
ECUA-2019-W21✽	-45.7	0	-5.59	0.03	-0.99	3649	842	3147	1.1618e+06	2817	Lake	Girón - San Fernando	Pasaje	3° 9'13.17"S	79°15'52.81"W	Gébelin et al. (this study)
ECUA-2019-W22	-59.3	0.4	-8.67	0.07	10.07	3649	833	3211	371091	2817	Stream	Girón - San Fernando	Pasaje	3° 9'13.17"S	79°15'52.81"W	Gébelin et al. (this study)
ECUA-2019-W23	-53.5	0.2	-7.78	0.02	8.76	2486	107	2432	17127.3	2399	Stream	Girón - San Fernando	Pasaje	3° 9'24.44"S	79°10'26.36"W	Gébelin et al. (this study)
ECUA-2019-W24	-38	0.6	-5.59	0.17	6.71	2683	786	2299	4.62437e+06	1927	Stream	Girón - San Fernando	Pasaje	3°11'40.96"S	79°10'41.52"W	Gébelin et al. (this study)
ECUA-2019-W25	-53.3	0.8	-8.13	0.09	11.72	3711	1605	2992	2.50725e+07	2094	Stream	Girón - San Fernando	Pasaje	3° 9'27.49"S	79° 8'56.14"W	Gébelin et al. (this study)
ECUA-2019-W26	-63.6	0.7	-9.47	0.13	12.17	3878	1158	3345	2.82248e+07	2730	Stream	Girón - San Fernando	Pasaje	3° 6'16.18"S	79° 6'13.22"W	Gébelin et al. (this study)
ECUA-2019-W46	-67.3	0.5	-10.04	0.05	13.02	3477	756	3130	2.46462e+07	2754	Stream	Nabón - Cuenca	Pasaje	3° 6'22.42"S	79° 0'35.71"W	Gébelin et al. (this study)
ECUA-2019-W47	-66.6	0.1	-10.59	0.07	18.08	2716	38	2701	52333.4	2688	Stream	Nabón - Cuenca	Pasaje	3° 5'33.46"S	79° 5'30.42"W	Gébelin et al. (this study)
ECUA-2019-W48	-63.6	0.8	-9.43	0.05	11.83	3878	1201	3296	3.12411e+07	2689	Stream	Nabón - Cuenca	Pasaje	3° 5'36.51"S	79° 5'33.14"W	Gébelin et al. (this study)
ECUA-2019-W49	-66.6	0.9	-9.73	0.15	11.17	3860	1220	3351	4.46166e+07	2661	Stream	Nabón - Cuenca	Pasaje	3° 4'43.78"S	79° 4'48.69"W	Gébelin et al. (this study)
ECUA-2019-W50	-71	0.8	-10.19	0.11	10.54	3914	1320	3044	4.2493e+08	2602	Stream	Nabón - Cuenca	Pasaje	2°57'40.98"S	79° 2'57.83"W	Gébelin et al. (this study)
ECUA-2019-W51	-66.8	0.2	-9.6	0.04	9.94	4300	1641	3660	3.98521e+08	2689	Stream	WSW of Cuenca	Yanuncay river	2°53'53.07"S	79° 4'31.69"W	Gébelin et al. (this study)
ECUA-2019-W52	-73	0.1	-11.22	0.04	16.78	3761	1053	3313	2.67091e+06	2719	Stream	WSW of Cuenca	Yanuncay river	2°54'45.91"S	79° 4'55.04"W	Gébelin et al. (this study)
ECUA-2019-W53	-70.2	0.1	-10.22	0.02	11.6	3833	1051	3461	3.38454e+06	2795	Stream	WSW of Cuenca	Yanuncay river	2°55'40.67"S	79° 6'15.58"W	Gébelin et al. (this study)
ECUA-2019-W54	-74.5	0.5	-10.62	0.07	10.41	3274	454	3062	190303	2822	Stream	WSW of Cuenca	Yanuncay river	2°55'52.93"S	79° 6'53.40"W	Gébelin et al. (this study)
ECUA-2019-W55	-72.7	1	-10.37	0.12	10.22	3188	341	3032	191255	2868	Stream	WSW of Cuenca	Yanuncay river	2°55'52.00"S	79° 7'39.42"W	Gébelin et al. (this study)
ECUA-2019-W56	-68.4	0.1	-10.11	0.05	12.5	4073	1194	3608	1.24944e+07	2888	Stream	WSW of Cuenca	Yanuncay river	2°56'2.88"S	79° 8'16.29"W	Gébelin et al. (this study)
ECUA-2019-W57	-72.9	0.1	-11.09	0.1	15.84	3619	695	3302	739328	2936	Stream	WSW of Cuenca	Yanuncay river	2°56'39.68"S	79° 8'53.68"W	Gébelin et al. (this study)
ECUA-2019-W58	-72.7	0.9	-10.97	0.1	15.07	3934	872	3590	5.02305e+06	3074	Stream	WSW of Cuenca	Yanuncay river	2°55'59.70"S	79°11'10.04"W	Gébelin et al. (this study)
ECUA-2019-W59	-68.8	0.2	-10.97	0.05	18.9	4300	1072	3858	4.5688e+07	3239	Stream	WSW of Cuenca	Yanuncay river	2°56'23.36"S	79°13'15.81"W	Gébelin et al. (this study)
ECUA-2019-W60	-58.9	0.2	-9.85	0.17	19.92	4034	935	3733	7.0907e+06	3106	Stream	WSW of Cuenca	Yanuncay river	2°55'53.00"S	79°11'37.00"W	Gébelin et al. (this study)
ECUA-2019-W61✽	-67.5	0.4	-10.3	0.06	14.88	3168	750	2850	1.61501e+07	2425	Stream	NE of Cuenca	Burgay river	2°46'11.60"S	78°50'56.03"W	Gébelin et al. (this study)
ECUA-2019-W62✽	-65	0.4	-10.06	0.07	15.42	3560	1047	3098	9.90243e+06	2526	Stream	NE of Cuenca	Burgay river	2°43'25.50"S	78°51'57.55"W	Gébelin et al. (this study)
ECUA-2019-W63	-64.6	0.2	-10.12	0.04	16.4	4173	1495	3437	5.94203e+07	2692	Stream	NE of Cuenca	Burgay river	2°42'5.00"S	78°54'53.31"W	Gébelin et al. (this study)
ECUA-2019-W64	-58.2	0.4	-8.97	0.03	13.56	3719	1006	3135	1.29225e+07	2714	Stream	NE of Cuenca	Burgay river	2°41'48.27"S	78°55'5.12"W	Gébelin et al. (this study)
ECUA-2019-W65	-58.1	0.3	-9.02	0.04	14.05	3929	1233	3380	3.69055e+07	2714	Stream	NE of Cuenca	Burgay river	2°41'48.27"S	78°55'5.12"W	Gébelin et al. (this study)
ECUA-2019-W66	-62.2	0.4	-9.43	0.08	13.22	3606	327	3423	1.79361e+06	3272	Stream	NE of Cuenca	Burgay river	2°38'7.41"S	78°55'38.99"W	Gébelin et al. (this study)
ECUA-2019-W67	-57.8	0.1	-9.81	0.03	20.66	3328	47	3307	49478.8	3280	Stream	NE of Cuenca	Burgay river	2°38'7.99"S	78°55'46.38"W	Gébelin et al. (this study)
ECUA-2019-W68	-59	0.4	-10.19	0.02	22.51	3789	488	3564	2.31123e+06	3304	Stream	NE of Cuenca	Burgay river	2°38'1.56"S	78°55'57.80"W	Gébelin et al. (this study)
ECUA-2019-W69	-64.3	0.4	-10.61	0.12	20.65	3531	123	3479	176982	3413	Stream	NE of Cuenca	Burgay river	2°37'46.86"S	78°56'28.32"W	Gébelin et al. (this study)
ECUA-2019-W70	-62.6	0.7	-10.19	0.15	18.89	3761	330	3564	804031	3427	Stream	NE of Cuenca	Burgay river	2°37'36.70"S	78°56'44.40"W	Gébelin et al. (this study)
ECUA-2019-W71	-63.4	0.4	-10.11	0.08	17.47	3807	384	3615	2.07811e+06	3440	Stream	NE of Cuenca	Burgay river	2°37'36.39"S	78°56'46.02"W	Gébelin et al. (this study)
ECUA-2019-W72✽	-38.1	0.4	-6.44	0.09	13.36	56	52	16	638467	64	Stream	Guayaquil - Cuenca	Puerto Inca	2°32'31.03"S	79°32'52.38"W	Gébelin et al. (this study)
ECUA-2019-W73	-36.5	0.1	-6.27	0.03	13.69	3332	3020	1609	2.88928e+07	311	Stream	Guayaquil - Cuenca	Puerto Inca	2°37'31.86"S	79°27'46.40"W	Gébelin et al. (this study)
ECUA-2019-W74	-36.1	0.3	-6.5	0.07	15.91	1944	940	1500	1.76792e+06	986	Stream	Guayaquil - Cuenca	Puerto Inca	2°39'43.01"S	79°26'46.65"W	Gébelin et al. (this study)
ECUA-2019-W75	-38.8	0.7	-6.7	0.03	14.78	2122	1082	1623	1.9468e+06	1020	Stream	Guayaquil - Cuenca	Puerto Inca	2°39'53.66"S	79°26'49.37"W	Gébelin et al. (this study)
ECUA-2019-W76	-48.2	0.2	-7.78	0.07	14.04	3595	2058	2469	1.07845e+07	1523	Stream	Guayaquil - Cuenca	Puerto Inca	2°41'22.80"S	79°28'3.47"W	Gébelin et al. (this study)
ECUA-2019-W77	-42.3	0.2	-7.19	0.01	15.19	2068	525	1814	359673	1540	Stream	Guayaquil - Cuenca	Puerto Inca	2°41'24.53"S	79°28'8.21"W	Gébelin et al. (this study)
ECUA-2019-W78	-56.1	0.1	-8.97	0.02	15.65	3595	1399	2927	3.90407e+06	2188	Stream	Guayaquil - Cuenca	Puerto Inca	2°42'39.23"S	79°27'0.39"W	Gébelin et al. (this study)
ECUA-2019-W79	-49.2	0.2	-7.93	0.03	14.28	2706	331	2580	309243	2376	Stream	Guayaquil - Cuenca	Puerto Inca	2°42'22.17"S	79°26'8.86"W	Gébelin et al. (this study)
ECUA-2019-W80	-50.6	0.2	-8.26	0.05	15.51	2852	298	2688	181740	2526	Stream	Guayaquil - Cuenca	Puerto Inca	2°43'34.44"S	79°24'53.72"W	Gébelin et al. (this study)
ECUA-2019-W81	-57.6	0.1	-8.97	0.04	14.09	3559	804	3210	2.45682e+06	2715	Stream	Guayaquil - Cuenca	Puerto Inca	2°45'6.49"S	79°24'42.98"W	Gébelin et al. (this study)
ECUA-2019-W82	-57.8	0.3	-8.97	0.05	14	3311	561	2992	719346	2715	Stream	Guayaquil - Cuenca	Puerto Inca	2°45'6.49"S	79°24'42.98"W	Gébelin et al. (this study)
ECUA-2019-W83	-60.6	0.9	-9.18	0.14	12.88	3933	1369	3395	8.23252e+06	2564	Stream	Guayaquil - Cuenca	Puerto Inca	2°46'37.13"S	79°23'53.37"W	Gébelin et al. (this study)
ECUA-2019-W84	-61.2	0.2	-9.07	0.03	11.37	3956	1090	3412	2.11427e+06	2762	Stream	Guayaquil - Cuenca	Puerto Inca	2°47'44.54"S	79°22'18.52"W	Gébelin et al. (this study)
ECUA-2019-W85	-65.9	0.1	-10.02	0.02	14.23	4428	1641	3771	2.05328e+07	2762	Stream	Guayaquil - Cuenca	Puerto Inca	2°47'44.54"S	79°22'18.52"W	Gébelin et al. (this study)
ECUA-2019-W86	-70.4	0.4	-10.24	0.11	11.44	4323	945	3993	1.74194e+07	3318	Stream	Guayaquil - Cuenca	Puerto Inca	2°48'22.87"S	79°18'48.23"W	Gébelin et al. (this study)
ECUA-2019-W87	-83.4	0.2	-12	0.03	12.58	4400	566	4132	273085	3860	Stream	Guayaquil - Cuenca	Puerto Inca	2°46'35.16"S	79°15'56.82"W	Gébelin et al. (this study)
ECUA-2019-W88	-68.8	0.4	-9.8	0.11	9.58	4200	229	4098	210285	3986	Stream	Guayaquil - Cuenca	Puerto Inca	2°47'17.01"S	79°13'7.36"W	Gébelin et al. (this study)
ECUA-2019-W89	-65.7	0.3	-9.13	0.02	7.35	4412	830	3976	2.3728e+07	3614	Stream	Guayaquil - Cuenca	Puerto Inca	2°46'53.40"S	79°11'16.08"W	Gébelin et al. (this study)
ECUA-2019-W90	-67	0.4	-9.98	0.06	12.82	4412	1266	3844	9.05682e+07	3165	Stream	Guayaquil - Cuenca	Puerto Inca	2°50'0.58"S	79° 7'51.43"W	Gébelin et al. (this study)
ECUA-2019-W91	-69.4	0.3	-10.34	0.06	13.35	3979	794	3722	3.41119e+06	3166	Stream	Guayaquil - Cuenca	Puerto Inca	2°50'0.10"S	79° 7'51.07"W	Gébelin et al. (this study)
ECUA-2019-W27	-39.5	0.6	-7.15	0.07	17.75	2768	195	2647	454825	2567	Stream	Oña	Nabon	3°28'31.43"S	79° 8'10.76"W	Gébelin et al. (this study)
ECUA-2019-W28	-48.4	0.9	-7.78	0.09	13.87	2642	0	2642	951.516	2648	Stream	Tazhana	Nabon	3°28'39.51"S	79° 7'48.62"W	Gébelin et al. (this study)
ECUA-2019-W29	-46.4	1.1	-7.69	0.17	15.19	3738	1889	2907	5.74568e+08	1925	Stream	Oña - Casadel	Nabon	3°24'50.24"S	79° 9'27.87"W	Gébelin et al. (this study)
ECUA-2019-W30✽	-37.4	0.8	-3.92	0.08	-5.97	2801	211	2733	114182	2534	Stream	Oña - Casadel	Nabon	3°23'37.26"S	79°10'21.32"W	Gébelin et al. (this study)
ECUA-2019-W31✽	-36.2	0.1	-3.73	0.05	-6.36	2720	0	2720	951.516	2724	Lake	Oña - Casadel	Nabon	3°23'28.04"S	79°10'31.25"W	Gébelin et al. (this study)
ECUA-2019-W32	-52.4	0.6	-7.8	0.03	9.99	3185	899	2830	1.70017e+07	2296	Stream	Oña - Casadel (Sanglia)	Nabon	3°22'13.36"S	79° 9'19.43"W	Gébelin et al. (this study)
ECUA-2019-W33	-56.5	0.2	-8.99	0.01	15.39	3496	874	3059	1.54532e+08	2626	Stream	Nabón	Nabon	3°18'11.29"S	79° 3'11.90"W	Gébelin et al. (this study)
ECUA-2019-W34	-55.1	0.8	-8.67	0.09	14.3	3311	566	3027	4.18096e+06	2739	Stream	Nabón	Nabon	3°20'7.94"S	79° 3'25.93"W	Gébelin et al. (this study)
ECUA-2019-W35	-56.6	0.1	-8.94	0.02	14.89	3738	1178	3099	6.3077e+07	2592	Stream	Nabón	Nabon	3°20'55.31"S	79° 4'39.62"W	Gébelin et al. (this study)
ECUA-2019-W36	-58.4	0.1	-9.13	0.04	14.68	2666	58	2633	9515.16	2653	Stream	Nabón	Nabon	3°21'8.67"S	79° 4'39.82"W	Gébelin et al. (this study)
ECUA-2019-W37	-58.9	0.8	-9.28	0.1	15.39	2842	95	2798	44721.3	2754	Stream	Nabón	Nabon	3°21'43.83"S	79° 4'29.91"W	Gébelin et al. (this study)
ECUA-2019-W38	-43.9	0.2	-7.84	0.03	18.81	2910	278	2736	1.2208e+06	2633	Stream	Nabón	Nabon	3°22'58.57"S	79° 5'5.07"W	Gébelin et al. (this study)
ECUA-2019-W39	-53	0.5	-8.7	0.02	16.61	2702	33	2688	32351.6	2678	Stream	Nabón	Nabon	3°23'11.71"S	79° 5'5.46"W	Gébelin et al. (this study)
ECUA-2019-W40	-45.3	0.4	-7.52	0.08	14.83	3082	632	2749	7.71489e+06	2468	Stream	Nabón	Nabon	3°23'55.31"S	79° 5'56.68"W	Gébelin et al. (this study)
ECUA-2019-W41	-48.9	1	-8.01	0.04	15.21	2585	45	2563	3806.07	2540	Stream	Nabón	Nabon	3°25'47.19"S	79° 6'5.85"W	Gébelin et al. (this study)
ECUA-2019-W42	-48.7	0.5	-8.1	0.04	16.11	3222	678	2991	1.98172e+07	2528	Stream	Nabón	Nabon	3°25'54.49"S	79° 5'45.68"W	Gébelin et al. (this study)
ECUA-2019-W43	-43.6	0.3	-7.54	0.08	16.71	3434	1159	2978	1.09668e+08	2340	Stream	Nabón	Nabon	3°27'8.32"S	79° 6'37.88"W	Gébelin et al. (this study)
✽	samples excluded from lapse rate calculations as well as on figures 3 and 4
Station name	δD (‰ VSMOW)		δ18O (‰ VSMOW)						Elevation (m asl)	Type of water sample			Latitude	Longitude	Authors
MACHALA	-9.4		-2.3						6	Precipitation			-3.25	-79.983	Jackson et al. (2019)
ESMERALDAS	-31.8		-5.2						30	Precipitation			0.967	-79.633	Jackson et al. (2019)
UZHCURRUMI	-21.1		-3.8						290	Precipitation			-3.322	-79.6	Jackson et al. (2019)
LA CONCORDIA	-29.1		-5.1						360	Precipitation			0.105	-79.283	Jackson et al. (2019)
ALLURIQUIN	-34.1		-5.7						850	Precipitation			-0.317	-78.967	Jackson et al. (2019)
SAN ANTONIO DE PICHINCHA	-55.5		-8						2450	Precipitation			-0.009	-78.44	Jackson et al. (2019)
CUENCA	-74.6		-10.6						2510	Precipitation			-2.883	-78.983	Jackson et al. (2019)
QUITO-INAMHI	-89.4		-12.5						2789	Precipitation			-0.167	-78.483	Jackson et al. (2019)
IZOBAMBA	-83.4		-11.8						3058	Precipitation			-0.37	-78.55	Jackson et al. (2019)
Station name	δD (‰ VSMOW)		δ18O (‰ VSMOW)						Recharge altitude (m asl)	Type of water sample			Latitude	Longitude	Authors
La Independencia	-22.4		-3.9						200	Springs			0.05	-79.41	Garcia et al. (1998)
Sto. Domingo	-32.4		-5.6						700	Springs			-0.3	-79.06	Garcia et al. (1998)
Huascachaca	-23.2		-4.3						770	Springs			-3.3	-79.53	Garcia et al. (1998)
Tandapi	-32.4		-5.3						1000	Springs			-0.34	-78.9	Garcia et al. (1998)
Girón	-36.7		-5.4						1780	Springs			-3.22	-79.2	Garcia et al. (1998)
Portete	-60.7		-8.7						2730	Springs			-3.11	-79.11	Garcia et al. (1998)
Cordillera Real	-76.3		-10.2						3540	Springs			-0.28	-78.25	Garcia et al. (1998)
La Virgen N	-110.1		-15.3						3870	Springs			-0.35	-78.2	Garcia et al. (1998)
Station name	δD (‰ VSMOW)		δ18O (‰ VSMOW)						Recharge altitude (m asl)	Type of water sample			Latitude	Longitude	Authors
Indice Precipit Local (Guayas)	-24		-4.5						150	Springs			-1.96	-79.88	Maldonado et al. (1995)
Pallantanga-Bucay (S. Pablo)	-36.5		-6						400	Springs			-2.19	-79.1	Maldonado et al. (1995)
Pallantanga (14 Km duspues)	-40.9		-6.2						700	Springs			-2.14	-79.05	Maldonado et al. (1995)
Panza Redonda	-44.6		-7						1700	Springs			-1.99	-78.96	Maldonado et al. (1995)
Rosas de Poliongo	-59.3		-7.6						2400	Springs			-1.95	-78.95	Maldonado et al. (1995)
Pangor (6 Km SW)	-70.4		-10						2800	Springs			-1.9	-78.91	Maldonado et al. (1995)
Pangor bajo	-75.4		-10.1						3100	Springs			-1.85	-78.89	Maldonado et al. (1995)
Pangor alto	-82.7		-11.3						3200	Springs			-1.82	-78.88	Maldonado et al. (1995)
Curva Juan de Velasco	-86.4		-12.2						3700	Springs			-1.81	-78.86	Maldonado et al. (1995)
Divisoria Atlantico-Pacifico	-86.9		-11.8						4000	Springs			-1.77	-78.8	Maldonado et al. (1995)
Calpi-Acequia	-102.6		-13.8						3400	Springs			-1.62	-78.77	Maldonado et al. (1995)
Comd. Tuntatacto	-88.7		-11.8						4000	Springs			-1.52	-78.67	Maldonado et al. (1995)
Indice Precipit Local (Guayas)	-24		-4.5						150	Springs			-1.96	-79.88	Maldonado et al. (1995)
Pallantanga-Bucay (S. Pablo)	-36.5		-6.1						400	Springs			-2.19	-79.1	Maldonado et al. (1995)
Pallantanga (14 Km duspues)	-34.8		-5.6						700	Springs			-2.14	-79.05	Maldonado et al. (1995)
Panza Redonda	-49.3		-7.9						1700	Springs			-1.99	-78.96	Maldonado et al. (1995)
Rosas de Poliongo	-60.6		-9						2400	Springs			-1.95	-78.95	Maldonado et al. (1995)
Pangor (6 Km SW)	-70.6		-10						2800	Springs			-1.9	-78.91	Maldonado et al. (1995)
Pangor bajo	-78.2		-10.5						3100	Springs			-1.85	-78.89	Maldonado et al. (1995)
Pangor alto	-81.1		-11.1						3200	Springs			-1.82	-78.88	Maldonado et al. (1995)
Curva Juan de Velasco	-87.9		-12.2						3700	Springs			-1.81	-78.86	Maldonado et al. (1995)
Divisoria Atlantico-Pacifico	-77.9		-10.8						4000	Springs			-1.77	-78.8	Maldonado et al. (1995)
Calpi-Acequia	-95.7		-12.9						3400	Springs			-1.62	-78.77	Maldonado et al. (1995)
Comd. Tuntatacto	-89.9		-12.3						4000	Springs			-1.52	-78.67	Maldonado et al. (1995)
